# Supplementary material
Source: HighWire-hosted journal article supplement (https://erj.ersjournals.com/content/61/4/2300300)
Supplement: inline-supplementary-material-1 [file inline-supplementary-material-1.pdf]

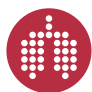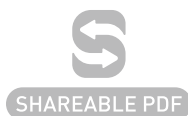

# Obstructive sleep apnoea, nocturnal hypoxaemia, and cognitive decline in elderly patients

AbdelKebir Sabil <sup>1</sup> and Frédéric Gagnadoux <sup>2</sup>

<sup>1</sup>Cloud Sleep Lab, Paris, France. <sup>2</sup>University of Angers and Department of Respiratory and Sleep Medicine, University Hospital of Angers, Angers, France.

Corresponding author: AbdelKebir Sabil ([kebir.sabil@cloudsleeplab.com](mailto:kebir.sabil@cloudsleeplab.com))

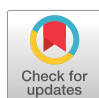

Shareable abstract (@ERSpublications)

**Obstructive sleep apnoea could represent a modifiable risk factor of major neurocognitive disorder in elderly patients** <http://bit.ly/3SQXA73>

**Cite this article as:** Sabil AK, Gagnadoux F. Obstructive sleep apnoea, nocturnal hypoxaemia, and cognitive decline in elderly patients. *Eur Respir J* 2023; 61: 2300300 [DOI: 10.1183/13993003.00300-2023].

This single-page version can be shared freely online.

Copyright ©The authors 2023.  
For reproduction rights and  
permissions contact  
[permissions@ersnet.org](mailto:permissions@ersnet.org)

Received: 19 Feb 2023  
Accepted: 23 Feb 2023

Major neurocognitive disorder (MND) is a clinical disorder with currently no curative treatment. Formerly known as dementia, MND interferes with the independence and daily life of patients, causing an impairment of both daytime functioning and sleep quality, leading to disability and death [1, 2]. There is a strong link between the prevalence of MND and advancing age in what is termed late-onset dementia [3]. In fact, more than 80% of MND occurs in individuals aged 65 years or older [4].
